# Supplementary material for: Different facets of dryness/wetness pattern in southwestern China over the past 27,000 years
Source: Copernicus journal article supplement (doi:10.5194/cp-2021-55), 2021-06-03

## Revised Fig. 5

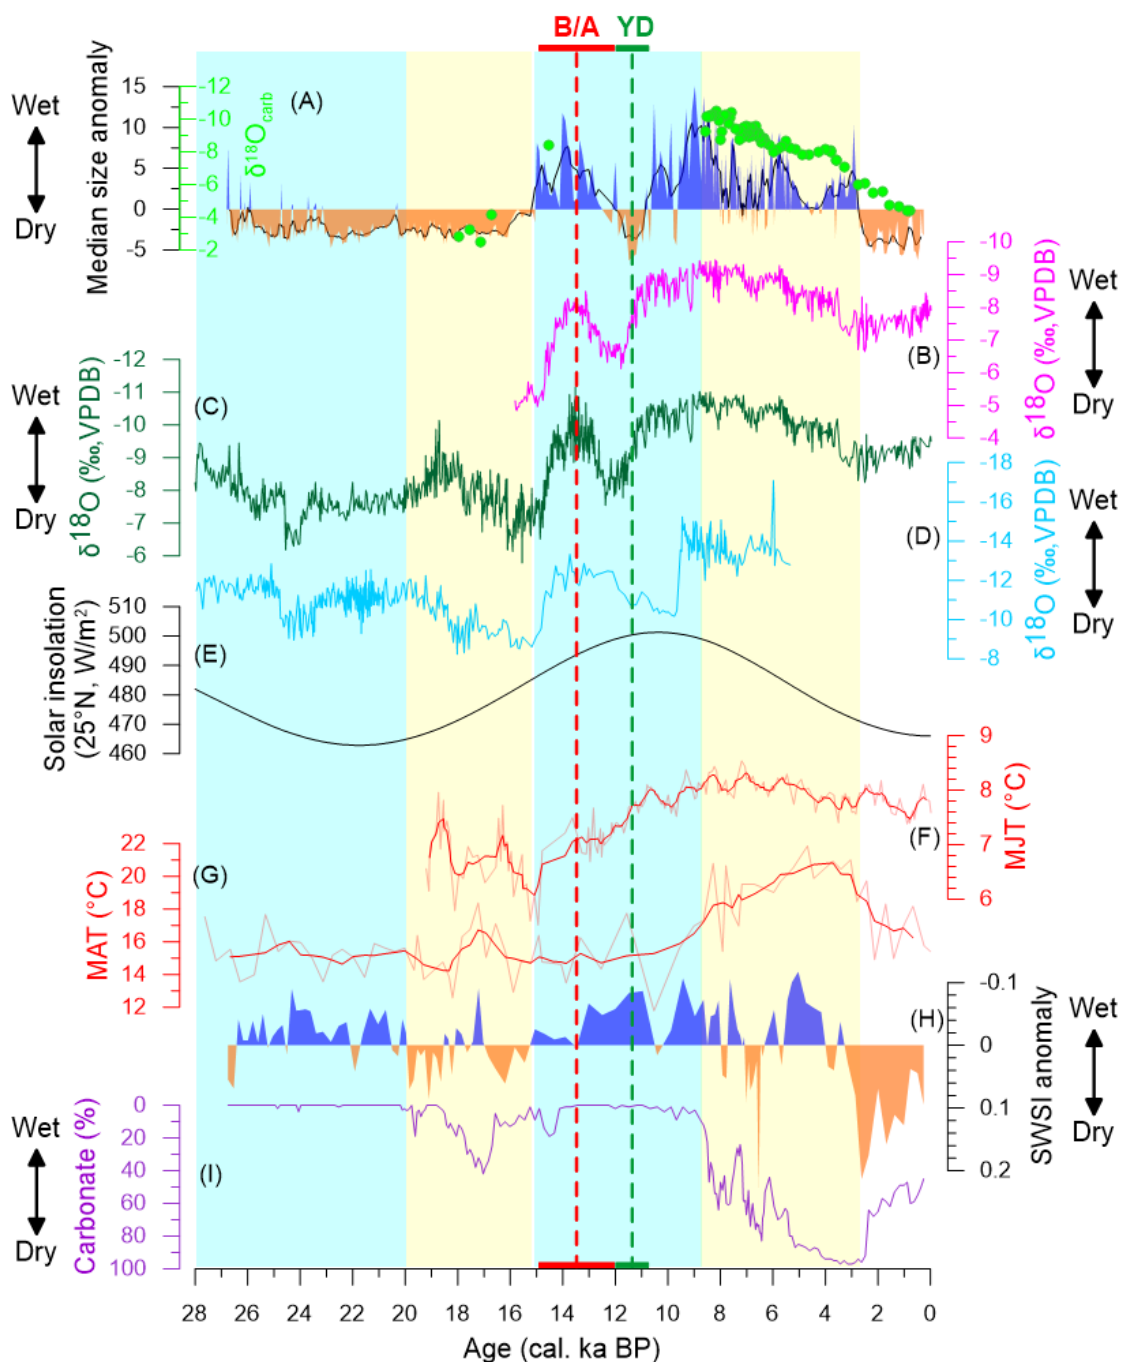

**Figure 5.** (A) Median size and  $\delta^{18}\text{O}_{\text{carb}}$  from Yilong Lake; Stalagmite  $\delta^{18}\text{O}$  records from (B) Sanbao Cave (Cheng et al., 2016), (C) Dongge Cave (Dykoski et al., 2005) and (D) Xiaobailong Cave (Cai et al., 2015); (E) Summer insolation curve for  $25^\circ\text{N}$ ; (F) chironomid-mean July temperature (MJT) from Tiancai Lake (Zhang et al., 2019a); (G) brGDGT-derived mean annual temperature (MAT) from Qionghai Lake (Wang et al., 2020); (H) pollen-based reconstructed SWSI for Yilong region; (I) carbonate content of sediments from Yilong Lake.

## Reconstructed P and T for Yilong Lake

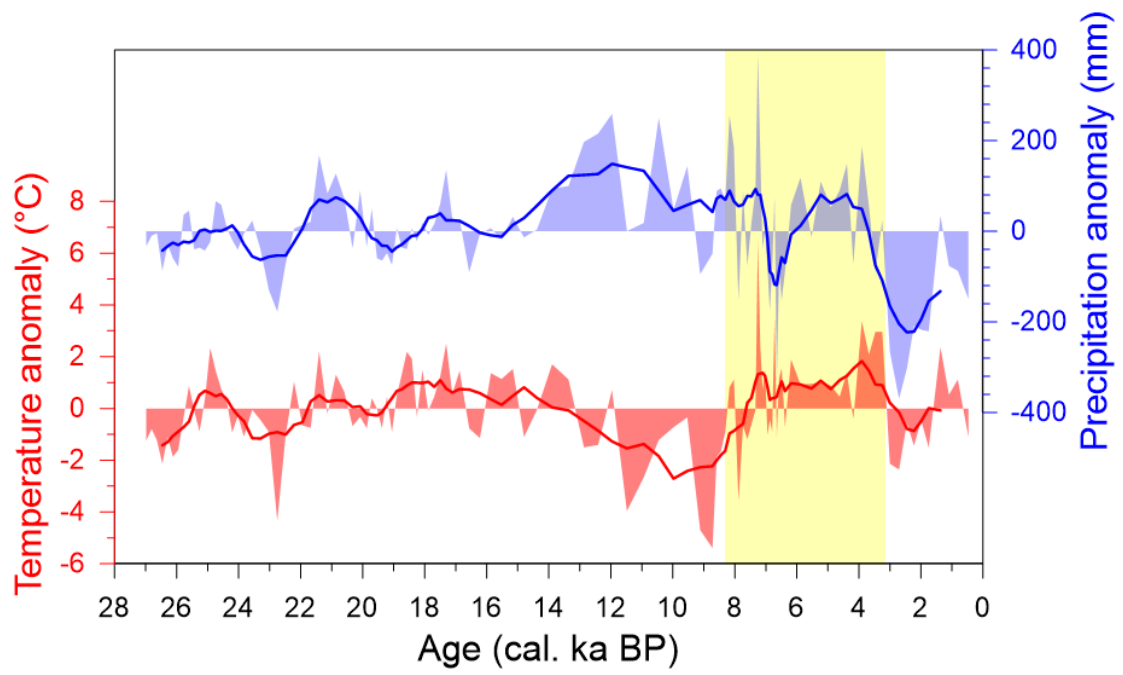

Supplement: Supplementary file [file cp-2021-55-AC3-supplement.pdf]
